# Supplementary material
Source: PubMed Central journal article supplement (PMC7674038)
Supplement: AAC.00297-20-s0001.pdf [file AAC.00297-20-s0001.pdf]

Supplementary Table 1. Oligonucleotide primers used in this study

| Gene                    | Forward primer       | Reverse primer      |
|-------------------------|----------------------|---------------------|
| <i>bla<sub>L1</sub></i> | GTCACCTGCTGGACAACATG | TCCATGATGATGCGGTCGG |
| <i>bla<sub>L2</sub></i> | GCTGCACATCGGGAAGCG   | TCGCCGATTCCTGCAGTTC |
| <i>smeA</i>             | TCAACCTCGACTACACCCGG | GTCCTCCAGCAGCACCTT  |
| 16S rDNA                | GACCTTGCGCGATTGAATG  | CGGATCGTCGCCTTGGT   |
